# Supplementary material for: Optimizing the Effect of tDCS on Motor Sequence Learning in the Elderly
Source: MDPI journal article supplement (doi:10.3390/brainsci13010137), 2023-01-12
Supplement: s1 [file s1]

# Optimizing the effect of tDCS on motor sequence learning in the elderly

Ensiyeh Ghasemian-Shirvan<sup>1,2,3</sup>, Ruxandra Ungureanu<sup>1,4</sup>, Lorena Melo<sup>1,2</sup>, Kim van Dun<sup>3</sup>, Min-Fang Kuo<sup>1</sup>, Michael A. Nitsche<sup>1,5</sup>, Raf L.J. Meesen<sup>3,6</sup>

1. Department of Psychology and Neurosciences, Leibniz Research Center for Working Environment and Human Factors, Dortmund, Germany
2. International Graduate School of Neuroscience, Ruhr-University Bochum, Bochum, Germany
3. Neuroplasticity and Movement Control Research Group, Rehabilitation Research Institute (REVAL), Hasselt University, Diepenbeek, Belgium
4. Institute of Cognitive Neuroscience, Ruhr-University Bochum, Bochum, Germany
5. Bielefeld University, University Hospital OWL, Protestant Hospital of Bethel Foundation, University Clinic of Psychiatry and Psychotherapy and University Clinic of Child and Adolescent Psychiatry and Psychotherapy
6. Movement Control and Neuroplasticity Research Group, Department of Movement Sciences, Group Biomedical Sciences, KU Leuven, Belgium

## Supplementary materials:

Results of post-hoc comparisons of blocks as well as block and condition interactions are listed in the tables below:

**Table S1. Post-hoc results of M-SRTT.** Results of post-hoc pairwise comparisons of the absolute reaction time of M-SRTT under all stimulation conditions are shown. Asterisks indicate significant results ( $p < 0.05$ ).

| Condition | Block      | Blocks       | <i>t</i> value | d.f. | Effect size <i>d</i> | <i>P</i> value |
|-----------|------------|--------------|----------------|------|----------------------|----------------|
| 1 mA      | 1 (Random) | 2 (Sequence) | 3.142          | 23   | 0.641                | 0.005*         |
|           |            | 3 (Sequence) | 1.203          | 23   | 0.246                | 0.241          |
|           |            | 4 (Sequence) | 1.067          | 23   | 0.218                | 0.297          |
|           |            | 5 (Sequence) | 2.657          | 23   | 0.542                | 0.014*         |
|           |            | 6 (Random)   | -1.040         | 23   | -0.212               | 0.309          |
|           |            | 7 (Sequence) | 1.164          | 23   | 0.238                | 0.256          |
|           |            | 8 (Sequence) | 1.078          | 23   | 0.220                | 0.292          |

|             |   |   |        |    |        |         |
|-------------|---|---|--------|----|--------|---------|
| <b>2 mA</b> | 1 | 2 | 2.711  | 23 | 0.553  | 0.012*  |
|             |   | 3 | 4.162  | 23 | 0.849  | <0.001* |
|             |   | 4 | 2.469  | 23 | 0.504  | 0.021*  |
|             |   | 5 | 2.900  | 23 | 0.592  | 0.008*  |
|             |   | 6 | -1.320 | 23 | -0.269 | 0.200   |
|             |   | 7 | 3.100  | 23 | 0.633  | 0.005*  |
|             |   | 8 | 3.334  | 23 | 0.680  | 0.003*  |
| <b>3 mA</b> | 1 | 2 | 3.487  | 23 | 0.712  | 0.002*  |
|             |   | 3 | 2.422  | 23 | 0.494  | 0.024*  |
|             |   | 4 | 2.693  | 23 | 0.550  | 0.013*  |
|             |   | 5 | 1.468  | 23 | 0.300  | 0.156   |
|             |   | 6 | -1.446 | 23 | -0.295 | 0.162   |
|             |   | 7 | 1.134  | 23 | 0.231  | 0.269   |
|             |   | 8 | 2.211  | 23 | 0.451  | 0.037*  |
| <b>Sham</b> | 1 | 2 | 3.376  | 23 | 0.689  | 0.003*  |
|             |   | 3 | 2.438  | 23 | 0.498  | 0.023*  |
|             |   | 4 | 2.223  | 23 | 0.454  | 0.036*  |
|             |   | 5 | 3.541  | 23 | 0.723  | 0.002*  |
|             |   | 6 | -1.079 | 23 | -0.220 | 0.292   |
|             |   | 7 | 1.447  | 23 | 0.295  | 0.161   |
|             |   | 8 | 2.183  | 23 | 0.446  | 0.039*  |

**Table S2. Post-hoc results of M-SRTT.** Results of post-hoc pairwise comparisons of the absolute reaction time of M-SRTT between block 6 (random block) to block 5 and 7 (sequence) under stimulation conditions are shown. Asterisks indicate significant results ( $p < 0.05$ ).

| Condition   | Block         | Blocks       | <i>t</i> value | d.f. | Effect size <i>d</i> | <i>P</i> value |
|-------------|---------------|--------------|----------------|------|----------------------|----------------|
| <b>1 mA</b> | 6<br>(Random) | 5 (Sequence) | 4.864          | 23   | 0.993                | <0.001*        |
|             |               | 7 (Sequence) | 3.913          | 23   | 0.799                | 0.001*         |
| <b>2 mA</b> | 6             | 5            | 6.179          | 23   | 1.261                | <0.001*        |
|             |               | 7            | 6.784          | 23   | 1.385                | <0.001*        |
| <b>3 mA</b> | 6             | 5            | 4.090          | 23   | 0.835                | <0.001*        |
|             |               | 7            | 3.211          | 23   | 0.655                | 0.004*         |
| <b>Sham</b> | 6             | 5            | 5.909          | 23   | 1.206                | <0.001*        |

|  |  |   |       |    |       |        |
|--|--|---|-------|----|-------|--------|
|  |  | 7 | 3.148 | 23 | 0.643 | 0.005* |
|--|--|---|-------|----|-------|--------|

**Table S3. Post-hoc results of M-SRTT.** Results of post-hoc pairwise comparisons of the normalised reaction time of M-SRTT under all stimulation conditions are shown. Asterisks indicate significant results ( $p < 0.05$ ).

| Condition   | Block      | Blocks       | <i>t</i> value | d.f. | Effect size <i>d</i> | <i>P</i> value |
|-------------|------------|--------------|----------------|------|----------------------|----------------|
| <b>1 mA</b> | 1 (Random) | 2 (Sequence) | 3.105          | 23   | 0.634                | 0.005*         |
|             |            | 3 (Sequence) | 1.555          | 23   | 0.318                | 0.133          |
|             |            | 4 (Sequence) | 1.412          | 23   | 0.288                | 0.171          |
|             |            | 5 (Sequence) | 2.709          | 23   | 0.553                | 0.013*         |
|             |            | 6 (Random)   | -1.225         | 23   | -0.250               | 0.233          |
|             |            | 7 (Sequence) | 1.169          | 23   | 0.239                | 0.255          |
|             |            | 8 (Sequence) | 1.263          | 23   | 0.258                | 0.219          |
| <b>2 mA</b> | 1          | 2            | 2.917          | 23   | 0.596                | 0.008*         |
|             |            | 3            | 4.283          | 23   | 0.874                | <0.001*        |
|             |            | 4            | 2.627          | 23   | 0.536                | 0.015*         |
|             |            | 5            | 3.030          | 23   | 0.619                | 0.006*         |
|             |            | 6            | -1.335         | 23   | -0.273               | 0.195          |
|             |            | 7            | 3.291          | 23   | 0.672                | 0.003*         |
|             |            | 8            | 3.455          | 23   | 0.705                | 0.002*         |
| <b>3 mA</b> | 1          | 2            | 3.752          | 23   | 0.766                | 0.001*         |
|             |            | 3            | 2.627          | 23   | 0.536                | 0.015*         |
|             |            | 4            | 2.850          | 23   | 0.582                | 0.009*         |
|             |            | 5            | 1.622          | 23   | 0.331                | 0.119          |
|             |            | 6            | -1.625         | 23   | -0.332               | 0.118          |
|             |            | 7            | 1.179          | 23   | 0.241                | 0.250          |
|             |            | 8            | 2.245          | 23   | 0.458                | 0.035*         |
| <b>Sham</b> | 1          | 2            | 3.354          | 23   | 0.685                | 0.003*         |
|             |            | 3            | 2.576          | 23   | 0.526                | 0.017*         |
|             |            | 4            | 2.489          | 23   | 0.508                | 0.021*         |
|             |            | 5            | 3.709          | 23   | 0.757                | 0.001*         |
|             |            | 6            | -1.156         | 23   | -0.236               | 0.259          |
|             |            | 7            | 1.687          | 23   | 0.344                | 0.105          |
|             |            | 8            | 2.423          | 23   | 0.495                | 0.024*         |

**Table S4. Post-hoc results of M-SRTT.** Results of post-hoc pairwise comparisons of the normalised reaction time of M-SRTT between block 6 (random block) to block 5 and 7 (sequence) under stimulation conditions are shown. Asterisks indicate significant results ( $p < 0.05$ ).

| Condition   | Block         | Blocks       | <i>t</i> value | d.f. | Effect size <i>d</i> | <i>P</i> value |
|-------------|---------------|--------------|----------------|------|----------------------|----------------|
| <b>1 mA</b> | 6<br>(Random) | 5 (Sequence) | 5.117          | 23   | 1.044                | <0.001*        |
|             |               | 7 (Sequence) | 4.300          | 23   | 0.878                | <0.001*        |
| <b>2 mA</b> | 6             | 5            | 6.204          | 23   | 1.266                | <0.001*        |
|             |               | 7            | 6.156          | 23   | 1.257                | <0.001*        |
| <b>3 mA</b> | 6             | 5            | 4.296          | 23   | 0.877                | <0.001*        |
|             |               | 7            | 3.696          | 23   | 0.754                | 0.001*         |
| <b>Sham</b> | 6             | 5            | 6.474          | 23   | 1.321                | <0.001*        |
|             |               | 7            | 3.365          | 23   | 0.687                | 0.003*         |

**Table S5. Post-hoc results of M-SRTT.** Results of post-hoc pairwise comparisons of the errors of M-SRTT under all stimulation conditions are shown. Asterisks indicate significant results ( $p < 0.05$ ).

| Condition   | Block      | Blocks       | <i>t</i> value | d.f. | Effect size <i>d</i> | <i>P</i> value |
|-------------|------------|--------------|----------------|------|----------------------|----------------|
| <b>1 mA</b> | 1 (Random) | 2 (Sequence) | -0.748         | 23   | -0.153               | 0.462          |
|             |            | 3 (Sequence) | -0.684         | 23   | -0.140               | 0.501          |
|             |            | 4 (Sequence) | -0.387         | 23   | -0.079               | 0.702          |
|             |            | 5 (Sequence) | 0.164          | 23   | 0.033                | 0.872          |
|             |            | 6 (Random)   | -0.328         | 23   | -0.067               | 0.746          |
|             |            | 7 (Sequence) | -0.144         | 23   | -0.029               | 0.887          |
|             |            | 8 (Sequence) | -0.352         | 23   | -0.072               | 0.728          |
| <b>2 mA</b> | 1          | 2            | 0.666          | 23   | 0.136                | 0.512          |
|             |            | 3            | 1.934          | 23   | 0.395                | 0.066          |
|             |            | 4            | 0.914          | 23   | 0.186                | 0.370          |
|             |            | 5            | 1.206          | 23   | 0.246                | 0.240          |
|             |            | 6            | -0.115         | 23   | -0.023               | 0.909          |
|             |            | 7            | 0.800          | 23   | 0.163                | 0.432          |

|             |   |   |        |    |        |        |
|-------------|---|---|--------|----|--------|--------|
|             |   | 8 | 0.807  | 23 | 0.165  | 0.428  |
| <b>3 mA</b> | 1 | 2 | 1.319  | 23 | 0.269  | 0.200  |
|             |   | 3 | 2.320  | 23 | 0.474  | 0.030* |
|             |   | 4 | 1.404  | 23 | 0.287  | 0.174  |
|             |   | 5 | 2.491  | 23 | 0.509  | 0.020* |
|             |   | 6 | 2.048  | 23 | 0.418  | 0.052  |
|             |   | 7 | 1.160  | 23 | 0.237  | 0.258  |
|             |   | 8 | 1.026  | 23 | 0.209  | 0.315  |
| <b>Sham</b> | 1 | 2 | -0.735 | 23 | -0.150 | 0.470  |
|             |   | 3 | -0.497 | 23 | -0.101 | 0.624  |
|             |   | 4 | -0.343 | 23 | -0.070 | 0.735  |
|             |   | 5 | -0.659 | 23 | -0.135 | 0.516  |
|             |   | 6 | -1.905 | 23 | -0.389 | 0.069  |
|             |   | 7 | 0.387  | 23 | 0.079  | 0.702  |
|             |   | 8 | 0.617  | 23 | 0.126  | 0.544  |

**Table S6. Post-hoc results of M-SRTT.** Results of post-hoc pairwise comparisons of the errors of M-SRTT between block 6 (random block) to block 5 and 7 (sequence) under stimulation conditions are shown. Asterisks indicate significant results ( $p < 0.05$ ).

| Condition   | Block         | Blocks       | <i>t</i> value | d.f. | Effect size <i>d</i> | <i>P</i> value |
|-------------|---------------|--------------|----------------|------|----------------------|----------------|
| <b>1 mA</b> | 6<br>(Random) | 5 (Sequence) | 0.569          | 23   | 0.116                | 0.575          |
|             |               | 7 (Sequence) | 0.177          | 23   | 0.036                | 0.861          |
| <b>2 mA</b> | 6             | 5            | 1.797          | 23   | 0.367                | 0.085          |
|             |               | 7            | 1.357          | 23   | 0.277                | 0.188          |
| <b>3 mA</b> | 6             | 5            | 0.000          | 23   | 0.000                | 1.000          |
|             |               | 7            | -1.101         | 23   | -0.225               | 0.282          |
| <b>Sham</b> | 6             | 5            | 2.488          | 23   | 0.508                | 0.021*         |
|             |               | 7            | 2.875          | 23   | 0.587                | 0.009*         |

**Table S7. Post-hoc results of M-SRTT.** Results of post-hoc pairwise comparisons of the variability of absolute reaction time of M-SRTT under all stimulation conditions are shown. Asterisks indicate significant results ( $p < 0.05$ ).

| Condition   | Block      | Blocks       | <i>t</i> value | d.f. | Effect size <i>d</i> | <i>P</i> value |
|-------------|------------|--------------|----------------|------|----------------------|----------------|
| <b>1 mA</b> | 1 (Random) | 2 (Sequence) | 0.818          | 23   | 0.167                | 0.422          |
|             |            | 3 (Sequence) | -2.015         | 23   | -0.411               | 0.056          |
|             |            | 4 (Sequence) | -2.280         | 23   | -0.465               | 0.032*         |
|             |            | 5 (Sequence) | -1.652         | 23   | -0.337               | 0.112          |
|             |            | 6 (Random)   | -3.548         | 23   | -0.724               | 0.002*         |
|             |            | 7 (Sequence) | -2.189         | 23   | -0.447               | 0.039*         |
|             |            | 8 (Sequence) | -3.223         | 23   | -0.658               | 0.004*         |
| <b>2 mA</b> | 1          | 2            | -0.665         | 23   | -0.136               | 0.513          |
|             |            | 3            | -0.690         | 23   | -0.141               | 0.497          |
|             |            | 4            | -2.771         | 23   | -0.566               | 0.011*         |
|             |            | 5            | -1.490         | 23   | -0.304               | 0.150          |
|             |            | 6            | -3.388         | 23   | -0.962               | 0.003*         |
|             |            | 7            | -2.611         | 23   | -0.533               | 0.016*         |
|             |            | 8            | -2.415         | 23   | -0.493               | 0.024*         |
| <b>3 mA</b> | 1          | 2            | -0.393         | 23   | -0.080               | 0.698          |
|             |            | 3            | -2.464         | 23   | -0.503               | 0.022*         |
|             |            | 4            | -3.011         | 23   | -0.615               | 0.006*         |
|             |            | 5            | -2.749         | 23   | -0.561               | 0.011*         |
|             |            | 6            | -3.077         | 23   | -0.628               | 0.005*         |
|             |            | 7            | -3.835         | 23   | -0.783               | <0.001*        |
|             |            | 8            | -4.552         | 23   | -0.929               | <0.001*        |
| <b>Sham</b> | 1          | 2            | 0.053          | 23   | 0.11                 | 0.958          |
|             |            | 3            | -2.258         | 23   | -0.461               | 0.034*         |
|             |            | 4            | -2.172         | 23   | -0.443               | 0.040*         |
|             |            | 5            | -2.438         | 23   | -0.498               | 0.023*         |
|             |            | 6            | -2.581         | 23   | -0.527               | 0.017*         |
|             |            | 7            | -3.202         | 23   | -0.654               | 0.004*         |
|             |            | 8            | -3.580         | 23   | -0.731               | 0.002*         |

**Table S8. Post-hoc results of M-SRTT.** Results of post-hoc pairwise comparisons of the variability of absolute reaction time of M-SRTT between block 6 (random block) to block 5 and 7 (sequence) under stimulation conditions are shown. Asterisks indicate significant results ( $p < 0.05$ ).

| Condition   | Block         | Blocks       | <i>t</i> value | d.f. | Effect size d | <i>P</i> value |
|-------------|---------------|--------------|----------------|------|---------------|----------------|
| <b>1 mA</b> | 6<br>(Random) | 5 (Sequence) | 1.503          | 23   | 0.307         | 0.146          |
|             |               | 7 (Sequence) | 0.820          | 23   | 0.167         | 0.420          |
| <b>2 mA</b> | 6             | 5            | 2.211          | 23   | 0.451         | 0.037*         |
|             |               | 7            | 0.925          | 23   | 0.189         | 0.365          |
| <b>3 mA</b> | 6             | 5            | 0.409          | 23   | 0.084         | 0.686          |
|             |               | 7            | -0.380         | 23   | -0.077        | 0.708          |
| <b>Sham</b> | 6             | 5            | 1.442          | 23   | 0.294         | 0.163          |
|             |               | 7            | -0.259         | 23   | -0.053        | 0.798          |

**Table S9. Post-hoc results of R-SRTT.** Results of post-hoc pairwise comparisons of the absolute reaction time of R-SRTT under all stimulation conditions are shown. Asterisks indicate significant results ( $p<0.05$ ).

| Condition   | Block      | Blocks       | <i>t</i> value | df | Effect size d | <i>P</i> value |
|-------------|------------|--------------|----------------|----|---------------|----------------|
| <b>1 mA</b> | 1 (Random) | 2 (Sequence) | 5.402          | 23 | 1.103         | <0.001*        |
|             |            | 3 (Sequence) | 4.727          | 23 | 0.965         | <0.001*        |
| <b>2 mA</b> | 1          | 2            | 5.728          | 23 | 1.169         | <0.001*        |
|             |            | 3            | 4.805          | 23 | 0.981         | <0.001*        |
| <b>3 mA</b> | 1          | 2            | 5.110          | 23 | 1.043         | <0.001*        |
|             |            | 3            | 3.595          | 23 | 0.734         | 0.002*         |
| <b>Sham</b> | 1          | 2            | 7.231          | 23 | 1.476         | <0.001*        |
|             |            | 3            | 5.707          | 23 | 1.165         | <0.001*        |

**Table S10. Post-hoc results of R-SRTT.** Results of post-hoc pairwise comparisons of the normalised reaction time of R-SRTT under all stimulation conditions are shown. Asterisks indicate significant results ( $p<0.05$ ).

| Condition   | Block      | Blocks       | <i>t</i> value | d.f. | Effect size d | <i>P</i> value |
|-------------|------------|--------------|----------------|------|---------------|----------------|
| <b>1 mA</b> | 1 (Random) | 2 (Sequence) | 5.540          | 23   | 1.131         | <0.001*        |
|             |            | 3 (Sequence) | 4.500          | 23   | 0.918         | <0.001*        |
| <b>2 mA</b> | 1          | 2            | 6.040          | 23   | 1.233         | <0.001*        |
|             |            | 3            | 5.092          | 23   | 1.039         | <0.001*        |

|             |   |   |       |    |       |         |
|-------------|---|---|-------|----|-------|---------|
| <b>3 mA</b> | 1 | 2 | 5.591 | 23 | 1.141 | <0.001* |
|             |   | 3 | 3.519 | 23 | 0.718 | <0.001* |
| <b>Sham</b> | 1 | 2 | 7.049 | 23 | 1.439 | <0.001* |
|             |   | 3 | 5.831 | 23 | 1.190 | <0.001* |

**Table S11. Post-hoc results of R-SRTT.** Results of post-hoc pairwise comparisons of the variability of absolute reaction time of the R-SRTT under all stimulation conditions are shown). Asterisks indicate significant results ( $p<0.05$ ).

| Condition   | Block        | Blocks       | <i>t</i> value | d.f. | Effect size d | <i>P</i> value |
|-------------|--------------|--------------|----------------|------|---------------|----------------|
| <b>1 mA</b> | 1 (Random)   | 2 (Sequence) | -1.885         | 23   | -0.385        | 0.072          |
|             |              | 3 (Sequence) | -4.717         | 23   | -0.963        | <0.001*        |
|             | 2 (Sequence) | 3 (Sequence) | -3.352         | 23   | -0.684        | 0.003*         |
| <b>2 mA</b> | 1            | 2            | 0.416          | 23   | 0.085         | 0.681          |
|             |              | 3            | 0.317          | 23   | 0.065         | 0.754          |
|             | 2            | 3            | -0.249         | 23   | -0.051        | 0.806          |
| <b>3 mA</b> | 1            | 2            | 1.018          | 23   | 0.208         | 0.319          |
|             |              | 3            | -1.459         | 23   | -0.298        | 0.158          |
|             | 2            | 3            | -2.569         | 23   | -0.524        | 0.017*         |
| <b>Sham</b> | 1            | 2            | -0.056         | 23   | -0.011        | 0.956          |
|             |              | 3            | -2.172         | 23   | -0.443        | 0.040*         |
|             | 2            | 3            | -2.687         | 23   | -0.549        | 0.013*         |

**Table S12. Post-hoc results of R-SRTT.** Results of post-hoc pairwise comparisons of the block  $\times$  condition interaction for the variability of absolute reaction time of the R-SRTT are shown. Asterisks indicate significant results ( $p<0.05$ ).

| Block                | intensity | intensity | <i>t</i> value | d.f. | Effect size d | <i>P</i> value |
|----------------------|-----------|-----------|----------------|------|---------------|----------------|
| <b>1</b><br>(Random) | Sham      | 1mA       | 0.902          | 23   | 0.184         | 0.376          |
|                      |           | 2mA       | -0.190         | 23   | -0.039        | 0.851          |
|                      |           | 3mA       | -0.257         | 23   | -0.052        | 0.800          |
|                      | 1mA       | 2mA       | 0.546          | 23   | 0.111         | 0.590          |



|                        |      |     |        |    |        |        |
|------------------------|------|-----|--------|----|--------|--------|
|                        |      | 3mA | 1.207  | 23 | 0.246  | 0.240  |
|                        | 2mA  | 3mA | -0.442 | 23 | -0.090 | 0.663  |
| <b>2</b><br>(Sequence) | Sham | 1mA | -0.203 | 23 | -0.041 | 0.841  |
|                        |      | 2mA | 0.501  | 23 | 0.102  | 0.621  |
|                        |      | 3mA | 0.456  | 23 | 0.093  | 0.652  |
|                        | 1mA  | 2mA | -0.728 | 23 | -0.149 | 0.474  |
|                        |      | 3mA | -0.944 | 23 | -0.193 | 0.355  |
|                        | 2mA  | 3mA | 0.003  | 23 | 0.001  | 0.998  |
| <b>3</b><br>(Sequence) | Sham | 1mA | -0.461 | 23 | -0.094 | 0.649  |
|                        |      | 2mA | -2.288 | 23 | -0.467 | 0.032* |
|                        |      | 3mA | 0.125  | 23 | 0.025  | 0.902  |
|                        | 1mA  | 2mA | -2.450 | 23 | -0.500 | 0.022* |
|                        |      | 3mA | -0.462 | 23 | -0.094 | 0.648  |
|                        | 2mA  | 3mA | -2.497 | 23 | -0.510 | 0.020* |
